# Supplementary material for: Identification of Novel Micropeptides Derived from Hepatocellular Carcinoma-Specific Long Noncoding RNA
Source: MDPI journal article supplement (doi:10.3390/ijms23010058), 2021-12-21
Supplement: s1 [file s1]

Table S1. Expression level of twelve HCC-specific lincRNAs in HepG2 and normal tissues (Fig. 1A).

[illegible]

Table S2. Primer table.

| Gene                   | Forward primer              | Reverse primer          |
|------------------------|-----------------------------|-------------------------|
| <i>Gapdh</i>           | TGTTGCCATCAATGACCCCTT       | CTCCACGACGTACTCAGCG     |
| <b>NONHSAT226968.1</b> | TTTAGACATTGTATGAGGCAGCATTGT | TAGACTCGCATCTCAAGATCCGA |
| <b>NONHSAT013026.2</b> | CTTGGGGCAGATGGCTTCCTG       | ATGAGGCTTAGGGAGAAGGCT   |
| <b>NONHSAT250607.1</b> | GGCCATGGAGAGAGAACACC        | ATTCCTCCACCGACAGAGC     |
| <b>NONHSAT115455.2</b> | TGCGTGCTGTTTATTGGAGC        | TGTCCCAAAGGAGGACCTG     |
| <b>NONHSAT168790.1</b> | CCCACTCAGTTCCAATTCCC        | TCCGGAGCCTGAGACTTACA    |

Table S3. Potential phosphorylation sites of Linc013026-68AA.

|                                             | Position in Linc013026-68AA | Sequence in Linc013026-68AA | Corresponding motif described in the literature (phosphorylated residues in red) | Features of motif described in the literature       | Link to original article describing the motif |
|---------------------------------------------|-----------------------------|-----------------------------|----------------------------------------------------------------------------------|-----------------------------------------------------|-----------------------------------------------|
| <b>Tyrosin phosphorylation</b>              | 20-23                       | PEYS                        | X[E/D] <b>pY</b> X                                                               | EGFR kinase substrate motif                         | [1]                                           |
|                                             | 21-22                       | EY                          | [E/D/Y] <b>pY</b>                                                                | TC-PTP phosphatase substrate motif                  | [2]                                           |
|                                             | 22-23                       | YS                          | <b>pY</b> [A/G/S/T/E/D]                                                          | Src kinase substrate motif                          | [3]                                           |
| <b>Serine and Threonine phosphorylation</b> | 15-20                       | LSWLRP                      | X[ <b>pS/pT</b> ]XXX[A/P/S/T]                                                    | G protein-coupled receptor kinase 1 substrate motif | [4]                                           |
|                                             | 22-24                       | YSQ                         | X <b>pS</b> Q                                                                    | DNA dependent Protein kinase substrate motif        | [5]                                           |
|                                             | 23-24                       | SQ                          | <b>pS</b> Q                                                                      | ATM kinase substrate motif                          | [3]                                           |
|                                             | 23-25                       | SQT                         | <b>pS</b> X[E/ <b>pS*</b> / <b>pT*</b> ]                                         | Casein Kinase II substrate motif                    | [6]                                           |
|                                             | 27-30                       | EIDT                        | [E/D]XX[ <b>pS/pT</b> ]                                                          | Casein Kinase I substrate motif                     | [7]                                           |

|  |       |       |                 |                                              |     |
|--|-------|-------|-----------------|----------------------------------------------|-----|
|  | 29-33 | DTWCQ | [E/D][pS/pT]XXX | b-Adrenergic Receptor kinase substrate motif | [4] |
|  | 37-40 | EPPS  | [E/D]XX[pS/pT]  | Casein Kinase I substrate motif              | [7] |
|  | 39-41 | PSW   | P[pS/pT]X       | DNA dependent Protein kinase substrate motif | [8] |
|  | 44-47 | DSLS  | [E/D]XX[pS/pT]  | Casein Kinase I substrate motif              | [7] |
|  | 44-48 | DSLVS | [E/D][pS/pT]XXX | b-Adrenergic Receptor kinase substrate motif | [4] |
|  | 45-47 | SLS   | pSX[E/pS*/pT*]  | Casein Kinase II substrate motif             | [6] |
|  | 65-68 | QPSP  | XXpSP           | GSK-3, ERK1, ERK2, CDK5 substrate motif      | [9] |
|  | 66-68 | PSP   | X[pS/pT]P       | GSK-3, ERK1, ERK2, CDK5 substrate motif      | [9] |
|  | 66-68 | PSP   | P[pS/pT]X       | DNA dependent Protein kinase substrate motif | [5] |
|  | 67-68 | SP    | pSP             | ERK1, ERK2 Kinase substrate motif            | [9] |

\* indicates the residue that has to phosphorylated already for the enzyme to recognize the motif

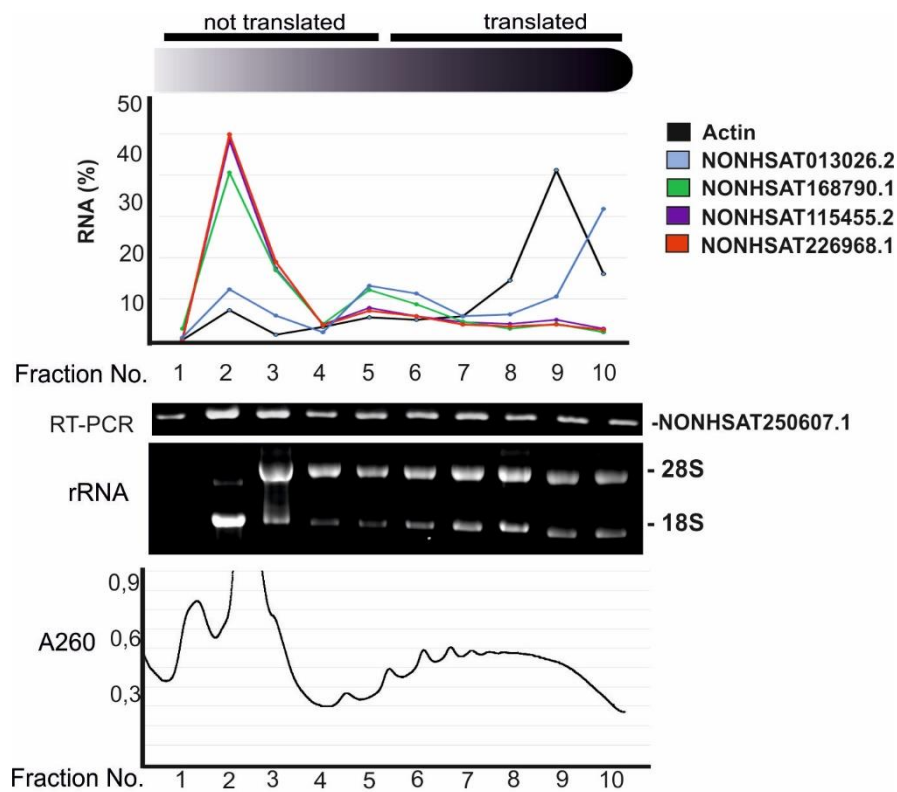

## Polenkowski et al., Figure S1

Figure S1. Replicate of polysome profiling experiment.

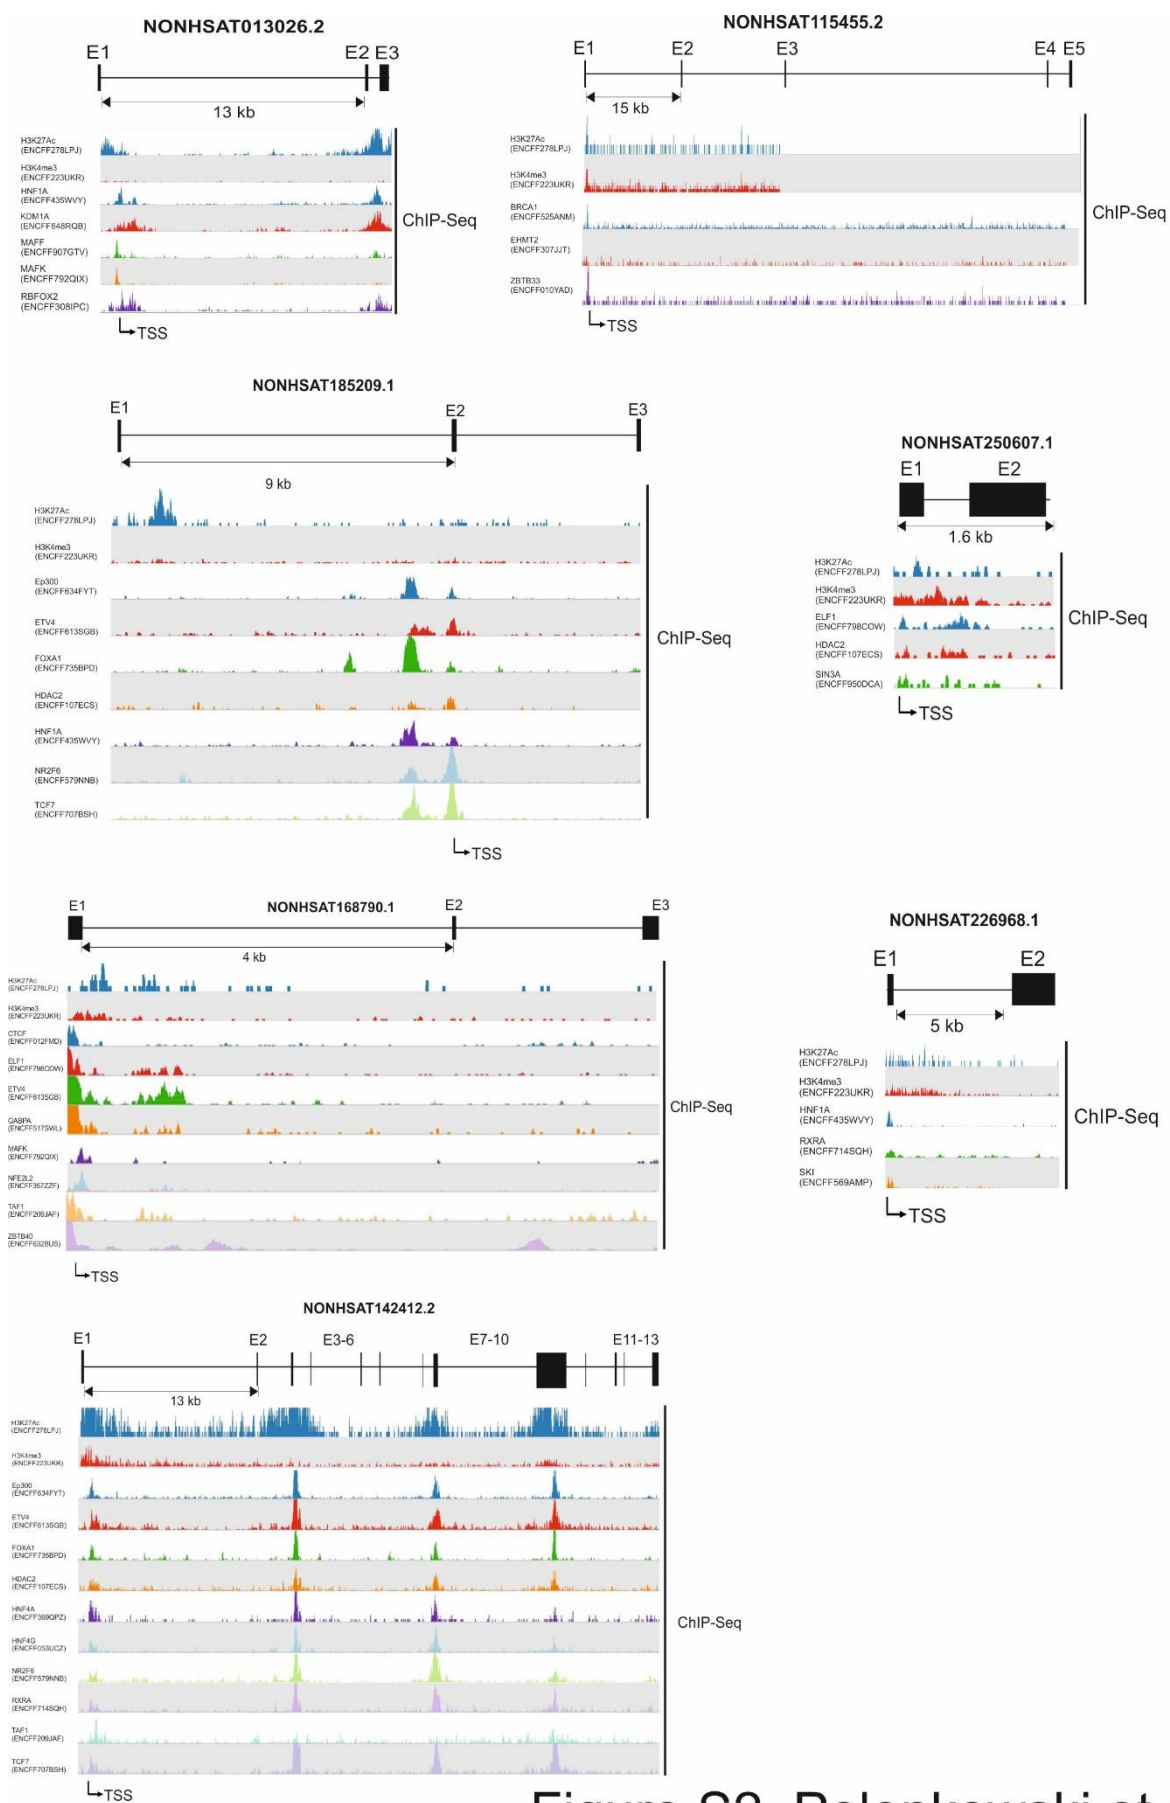

Figure S2, Polenkowski et al.

Figure S2. ChIP-seq of H3K4me3 and H3K27Ac and transcription factors that potentially initiate gene transcription of HCC-specific lncRNAs in HepG2 cells.

A

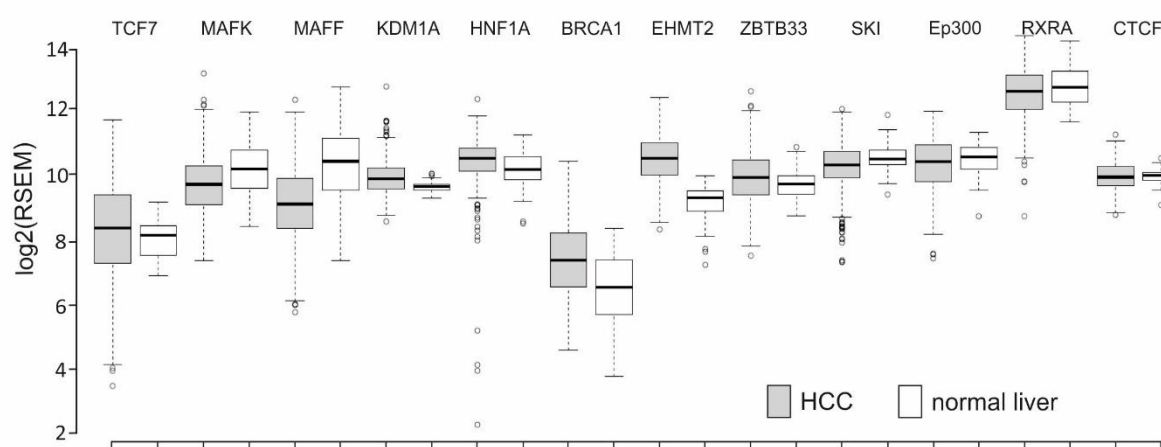

B

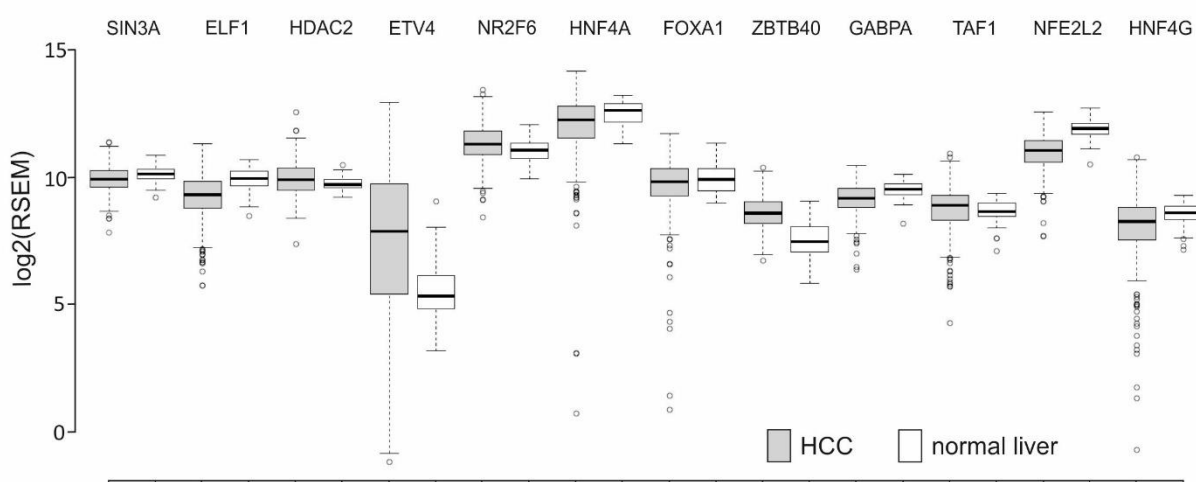

Figure S3, Polenkowski et al.

Figure S3. RNA expression level of transcription factors that potentially initiate gene transcription of HCC-specific lncRNAs in normal liver and primary HCC retrieved from TCGA data.

## References

1. Songyang, Z.; Cantley, L. C., Recognition and specificity in protein tyrosine kinase-mediated signalling. *Trends in biochemical sciences* **1995**, 20, (11), 470-5.

2. Asante-Appiah, E.; Ball, K.; Bateman, K.; Skorey, K.; Friesen, R.; Desponts, C.; Payette, P.; Bayly, C.; Zamboni, R.; Scapin, G.; Ramachandran, C.; Kennedy, B. P., The YRD motif is a major determinant of substrate and inhibitor specificity in T-cell protein-tyrosine phosphatase. *The Journal of biological chemistry* **2001**, 276, (28), 26036-43.
3. Schwartz, D.; Gygi, S. P., An iterative statistical approach to the identification of protein phosphorylation motifs from large-scale data sets. *Nature biotechnology* **2005**, 23, (11), 1391-8.
4. Onorato, J. J.; Palczewski, K.; Regan, J. W.; Caron, M. G.; Lefkowitz, R. J.; Benovic, J. L., Role of acidic amino acids in peptide substrates of the beta-adrenergic receptor kinase and rhodopsin kinase. *Biochemistry* **1991**, 30, (21), 5118-25.
5. Lees-Miller, S. P.; Anderson, C. W., The DNA-activated protein kinase, DNA-PK: a potential coordinator of nuclear events. *Cancer cells* **1991**, 3, (9), 341-6.
6. Roach, P. J., Multisite and hierarchal protein phosphorylation. *The Journal of biological chemistry* **1991**, 266, (22), 14139-42.
7. Marin, O.; Bustos, V. H.; Cesaro, L.; Meggio, F.; Pagano, M. A.; Antonelli, M.; Allende, C. C.; Pinna, L. A.; Allende, J. E., A noncanonical sequence phosphorylated by casein kinase 1 in beta-catenin may play a role in casein kinase 1 targeting of important signaling proteins. *Proceedings of the National Academy of Sciences of the United States of America* **2003**, 100, (18), 10193-200.
8. Watanabe, F.; Teraoka, H.; Iijima, S.; Mimori, T.; Tsukada, K., Molecular properties, substrate specificity and regulation of DNA-dependent protein kinase from Raji Burkitt's lymphoma cells. *Biochimica et biophysica acta* **1994**, 1223, (2), 255-60.
9. Luo, M.; Reyna, S.; Wang, L.; Yi, Z.; Carroll, C.; Dong, L. Q.; Langlais, P.; Weintraub, S. T.; Mandarino, L. J., Identification of insulin receptor substrate 1 serine/threonine phosphorylation sites using mass spectrometry analysis: regulatory role of serine 1223. *Endocrinology* **2005**, 146, (10), 4410-6.
